# Supplementary material
Source: MDPI journal article supplement (https://www.mdpi.com/2073-4344/13/2/249)
Supplement: s1 [file s1]

# Catalytic Etching and Oxidation of Platinum Group Metals: Morphology, Chemical Composition and Structure of Pt, Pd and Rh foils in the O<sub>2</sub> Atmosphere and during NH<sub>3</sub> Oxidation with Air at 1133 K

Aleksei Salanov \*, Alexandra Serkova, Lyubov Isupova, Sergey Tsybulya and Valentin Parmon

Boriskov Institute of Catalysis SB RAS, 630090 Novosibirsk, Russia; serkova@catalysis.ru (A.S.); isupova@catalysis.ru (L.I.); tsybulya@catalysis.ru (S.T.); parmon@catalysis.ru (V.P.)

\* Correspondence: salanov@catalysis.ru

## 2. Results

### 2.2. Morphology and chemical composition of Pt(poly), Pd(poly) and Rh(poly) in the O<sub>2</sub> atmosphere

Pt(poly) images after annealing in O<sub>2</sub>

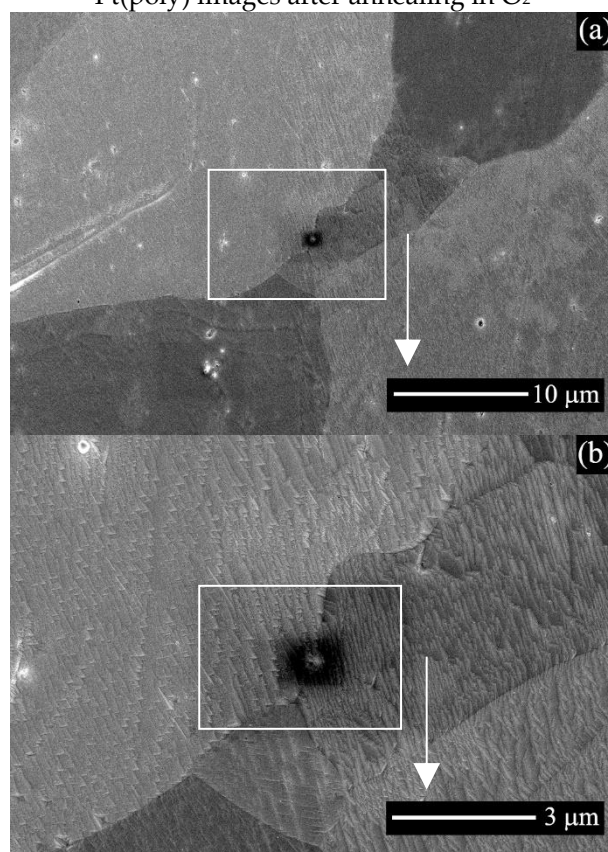

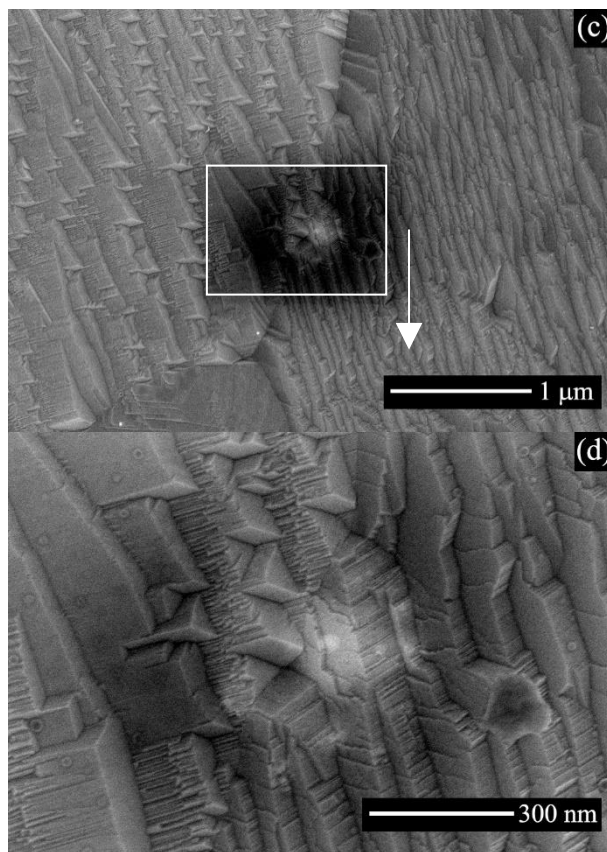

**Figure S1.** SEM images of the Pt(poly) surface after annealing in O<sub>2</sub> at Po<sub>2</sub> = 1 bar and 1100 K for 3 h. Images were obtained in SE mode at E<sub>0</sub> = 20 keV; rectangles indicate the regions represented by images with a higher magnification.

### 2.3. Morphology and chemical composition of Pt(poly), Pd(poly) and Rh(poly) after NH<sub>3</sub> oxidation with air at 1133 K for 1, 5 and 10 hours

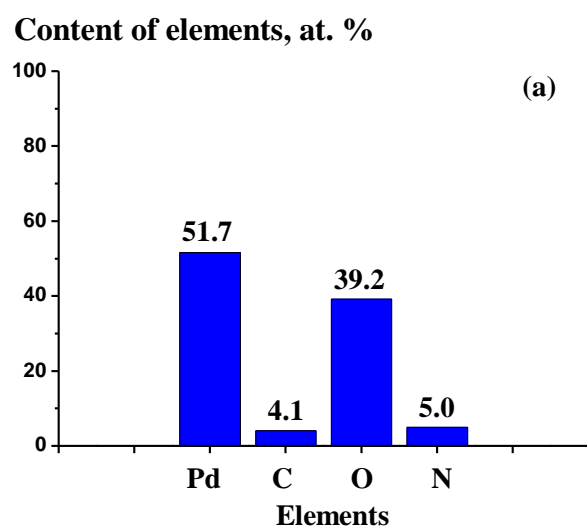

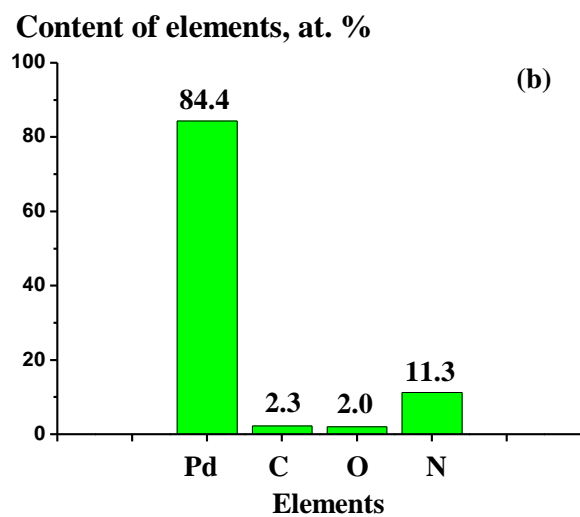

**Figure S2.** Concentrations of Pd, C, O and N on Pd(poly) after NH<sub>3</sub> oxidation at 1133 K for 1 (a) and 5 (b) hours according to EDS data obtained at  $E_0 = 20$  keV.
